# Supplementary material
Source: Springer Nature journal article supplement (https://www.springermedizin.de/resource/supplementary/12913_2011_2498_MOESM9_ESM.docx/9532098)
Supplement: MOESM9 [file 9532098]

Figure 1: flowchart of residents in the RCT design of the introduction of the multidisciplinary integrated care model

Control homes (**N=5**)

Residents listed (n=171)

Mean per home 34, range (6-56)

Intervention homes **(N=5**)

Residents listed (n=291)

Mean per home 58, range (31-93)

No informed consent (n=32)

-Died (7)

-To nursing home (2)

-Unknown (10)

-Refusal (13)

Interviews T0 completed (**n=13**9)

-By proxy (n=25)

-By resident (n=114)

Interviews T0 completed (**n=201**)

-By proxy (n=29)

-By resident (n=159)

No informed consent (n=90)

-Died (28)

-To hospital (2)

-To nursing home (13)

-Refusal (29)

Total missing (n=52)

-Dead (15)

-Refusal (13)

-nursing home admission (6)

-Other reasons (18)

Interviews T1 completed (**n=87)**

-By proxy (n=34)

-By resident (n=53)

Interviews T1 completed (**n=147**)

-By proxy (n=37)

-By resident (n=110)

Total missing (n=54)

-Dead (18)

-Refusal (18)

-nursing home admission (5)

-Other reasons (13)

Residential care homes for elderly

(**N=11**)

In primary analysis

-Risk indicators (n=76)

-Short Form12 item (n=73)

-Groningen Activity Restriction scale (n=83)

-Care quality through patient’s eyes (77)

-Hospitalisation (n=139)

-Mortality (n=139)

In primary analysis

-Risk indicators (n=145)

-Short Form12 item (n=134)

--Groningen Activity Restriction scale (n=139)

-Care quality through patient’s eyes (131)

-Hospitalisation (n=201)

-Mortality (n=201)

Approached

Baseline

Follow-up

Analyzed

Randomized

No IC

Drop out

Pilot home **(N=1**)
